# Supplementary material for: Diabetes, Glycemic Control, and Risk of Tuberculosis: A population-based case-control study
Source: PubMed Central journal article supplement — Diabetes Care. 2011 Nov 14;34(12):2530–5. doi: 10.2337/dc11-0902 (PMC3220855; doi:10.2337/dc11-0902), 2011-11-14

SUPPLEMENTARY DATA

**Supplementary Table 1: ICD and ATC codes**

|                                     |                                                                                                                                  |
|-------------------------------------|----------------------------------------------------------------------------------------------------------------------------------|
| <b>Tuberculosis</b>                 | ICD-8: 010-019; ICD-10: A15-A19                                                                                                  |
| <b>Diabetes</b>                     | ICD-8: 249-250; ICD-10: E10-E14, O24 (except O24.4), H36.0; ATC-codes: A10A, A10B                                                |
| <b>Comorbidities</b>                |                                                                                                                                  |
| Myocardial infarction               | ICD-8: 410; ICD-10: I21,I22,I23                                                                                                  |
| Congestive heart failure            | ICD-8: 427.09, 427.10, 427.11, 427.19, 428.99, 782.49; ICD-10: I50, I11.0, I13.0, I13.2                                          |
| Peripheral vascular disease         | ICD-8: 440, 441, 442, 443, 444, 445; ICD-10: I70, I71, I72, I73, I74, I77                                                        |
| Cerebrovascular disease             | ICD-8: 430-438; ICD-10: I60-I69, G45, G46                                                                                        |
| Dementia                            | ICD-8: 290.09-290.19, 293.09; ICD-10: F00-F03, F05.1, G30                                                                        |
| Chronic pulmonary disease           | ICD-8: 490-493, 515-518; ICD-10: J40-J47, J60-J67, J68.4, J70.1, J70.3, J84.1, J92.0, J96.1, J98.2, J98.3                        |
| Connective tissue disease           | ICD-8: 712, 716, 734, 446, 135.99; ICD-10: M05, M06, M08, M09, M30, M31, M32, M33, M34, M35, M36, D86                            |
| Ulcer disease                       | ICD-8: 530.91, 530.98, 531-534; ICD-10: K22.1, K25-K28                                                                           |
| Mild liver disease                  | ICD-8: 571, 573.01, 573.04; ICD-10: B18, K70.0-K70.3, K70.9, K71, K73, K74, K76.0                                                |
| Hemiplegia                          | ICD-8: 344; ICD-10: G81, G82                                                                                                     |
| Moderate to severe renal disease    | ICD-8: 403, 404, 580-583, 584, 590.09, 593.19, 753.10-753.19, 792; ICD-10: I12, I13, N00-N05, N07, N11, N14, N17-N19, Q61        |
| Any tumor                           | ICD-8: 140-194; ICD-10: C00-C75                                                                                                  |
| Leukemia                            | ICD-8: 204-207; ICD-10: C91-C95                                                                                                  |
| Lymphoma                            | ICD-8: 200-203, 275.59; ICD-10: C81-C85, C88, C90, C96                                                                           |
| Moderate to severe liver disease    | ICD-8: 070.00, 070.02, 070.04, 070.06, 070.08, 573.00, 456.00-456.09; ICD-10: B15.0, B16.0, B16.2, B19.0, K70.4, K72, K76.6, I85 |
| Metastatic solid tumor              | ICD-8: 195-198, 199; ICD-10: C76-C80                                                                                             |
| AIDS                                | ICD-8: 079.83; ICD-10: B21-B24                                                                                                   |
| Alcoholism-related disorders        | ICD-8: 291, 303, 979, 980, 577.10; ICD-10: F10, G31.2, G62.1, G72.1, I42.6, K29.2, K86.0, R78.0, T51, Z71.4, Z72.1               |
| <b>Comedications</b>                |                                                                                                                                  |
| Inhalation corticosteroids          | ATC-codes: R03BA, R03AK06, R03AK07                                                                                               |
| Peroral corticosteroids             | ATC-code: H02AB                                                                                                                  |
| Other immunosuppressive medications | ATC-codes: L01, L04                                                                                                              |
| Proton pump inhibitors              | ATC-code: A02BC                                                                                                                  |

SUPPLEMENTARY DATA

Supplementary Figure: Flow chart of included and excluded individuals

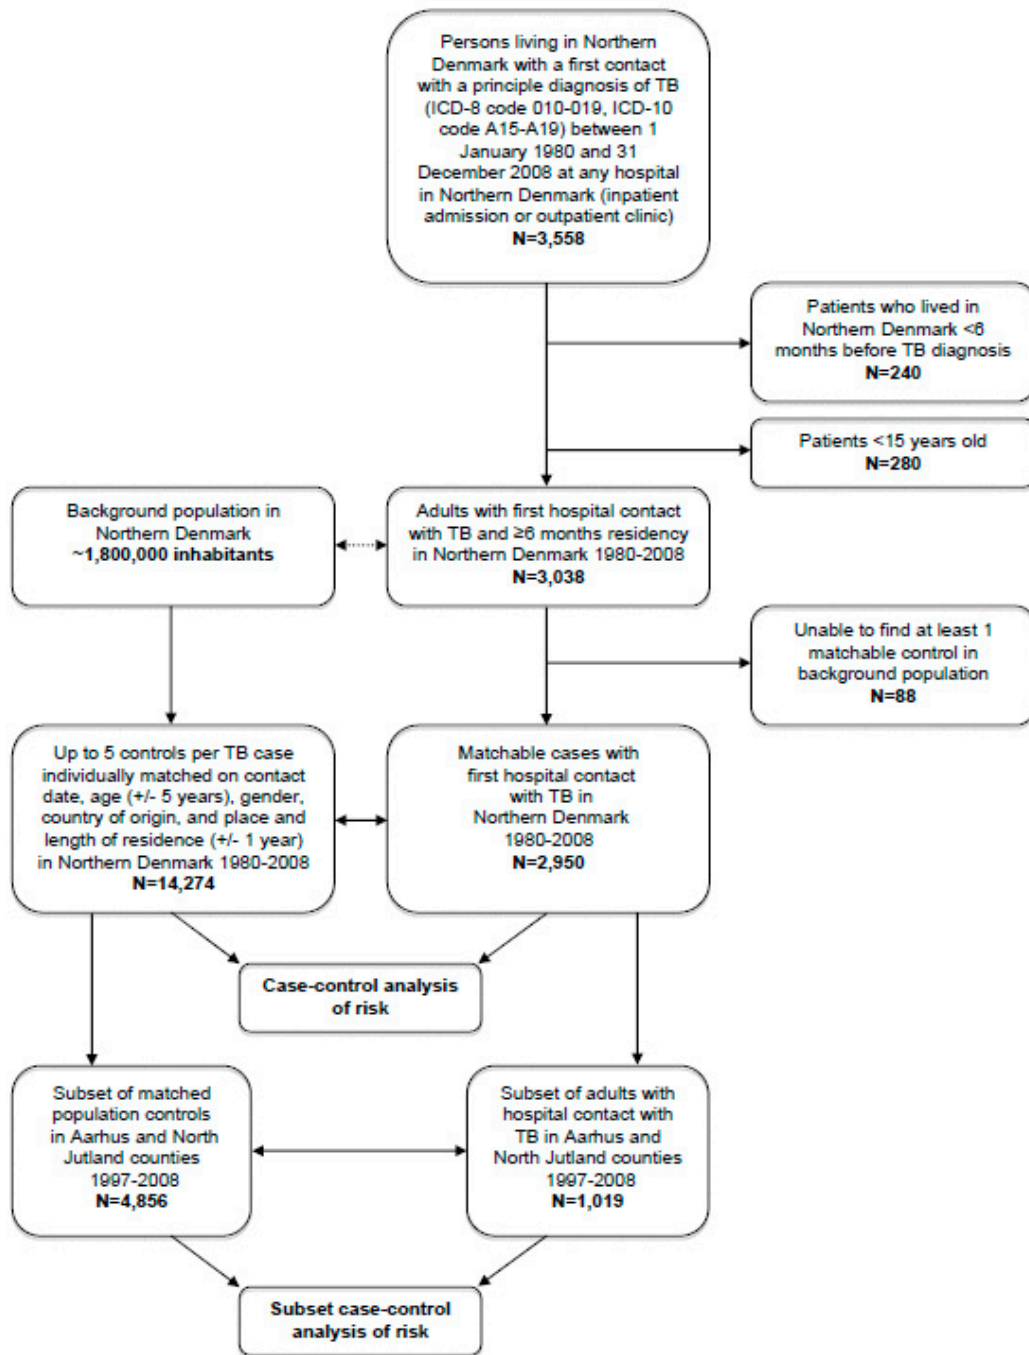

Supplement: supp_dc11-0902v110902_DC110902SupplementaryData.pdf [file supp_dc11-0902v110902_DC110902SupplementaryData.pdf]
